# Supplementary material
Source: publisher site journal article supplement (https://www.dovepress.com/article/487417)
Supplement: Supplementary file 1 [file get_supplementary_file.php]

Supplementary Table 1: Key questions for systematic review on the patient-centred counselling tools for dispensing contraceptives in community pharmacy settings

| Key Question (Q) number | Questions | |
| --- | --- | --- |
| 1 | | Do tools consist of assessment of **patient preferences**?  *(preferences, values, beliefs and treatment options, with consideration of the patient's lifestyle, cultural and personal goals)* |
| 2 | | Does it provide clear and understandable format?  *(to explain the correct contraceptive methods with* ***Interactive decision aid*** *with potential risk and benefits of interventions shared)* |
| 3 | | Does the tool can help to create **personalised treatment plans**?  *(based on patient’s preferences and clinical information with realistic and achievable goals)* |
| 4 | | Do tools incorporate features that could allow to assess progress or related **goals that help patients for regular** **monitoring** for important clinical parameters? |
| 5 | | Do tools act as a level of **communication facilitation**?  *(easier to discuss sensitive topics and encourage patients to share the relevant information prior to dispensing)* |
| 6 | | Do tools facilitate **shared decision making** ?  *(ensure that information gathered with the tools allows patients to picture the benefits and disadvantages of different options)* |
| 7 | | Do the tools incorporate **cultural sensitivity** to accommodate diverse cultural beliefs and practices ? |
| 8 | | Is the tool **easily accessible** at community settings ? – any consideration with easy navigation |
| 9 | | Are the tools able to establish **protocols for patient** and proper follow up? |
| 10 | | Do the tools have any measures to protect patient information to ensure **security and privacy** ? |
